# Supplementary material for: Determining the most promising anchors for CuSCN: ab initio insights towards p-type DSSCs
Source: Royal Society of Chemistry journal article supplement (doi:10.1039/c5ta10421a), 2016-01-01
Supplement: c5ta10421a1.pdf [file c5ta10421a1.pdf]

# ESI for

## Determining the Most Promising Anchors for CuSCN: Ab Initio Insights towards p-Type DSSCs

Kathy J. Chen,<sup>†</sup> Adèle D. Laurent,<sup>†</sup> Florent Boucher,<sup>‡</sup> Fabrice Odobel,<sup>†</sup> and  
Denis Jacquemin<sup>\*,†,¶</sup>

*Laboratoire CEISAM - UMR CNRS 6230, Université de Nantes, 2 Rue de la  
Houssinière, BP 92208, 44322 Nantes Cedex 3, France, Institut des Matériaux Jean  
Rouxel (IMN), Université de Nantes, 2 Rue de la Houssinière, BP32229, 44322 Nantes  
Cedex 3, France, and Institut Universitaire de France, 1, rue Descartes, 75231 Paris  
Cedex 05, France.*

E-mail: Denis.Jacquemin@univ-nantes.fr

---

\*To whom correspondence should be addressed

<sup>†</sup>CEISAM, Nantes

<sup>‡</sup>IMN, Nantes

<sup>¶</sup>IUF, Paris

## Surface energies

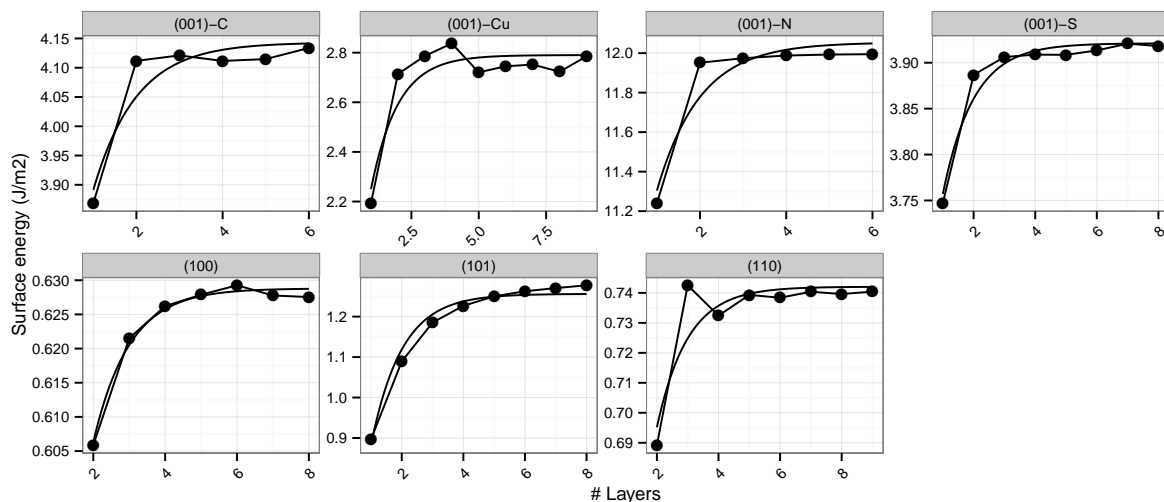

Figure S-1: Convergence of surface energies ( $\text{J}/\text{m}^2$ ) with the number of layers.

## Comparison of contour plots

The adsorption energies for each combination of anchor and surface are standardized as  $(x - \mu)/\sigma$  for a fair scale of comparison. The tables below show the pairwise distances computed for the matrix where the rows correspond to the four monodentate anchors and the columns to each x-y observation on the screening grid. The distance between each anchor is computed as the Euclidean distance,  $d = \sqrt{\sum (x_i + y_i)^2}$ .

**Table S-I: Pairwise distances for anchors on (110)**

|               | aniline | pyridine | thiophenol | thiophenoxide |
|---------------|---------|----------|------------|---------------|
| aniline       | –       | 5.29     | 4.90       | 8.78          |
| pyridine      | 5.29    | –        | 5.89       | 8.02          |
| thiophenol    | 4.90    | 5.89     | –          | 8.39          |
| thiophenoxide | 8.78    | 8.02     | 8.39       | –             |

**Table S-II: Pairwise distances for anchors on (100)**

|               | aniline | pyridine | thiophenol | thiophenoxide |
|---------------|---------|----------|------------|---------------|
| aniline       | –       | 4.44     | 5.79       | 7.29          |
| pyridine      | 4.44    | –        | 5.14       | 7.03          |
| thiophenol    | 5.79    | 5.14     | –          | 7.23          |
| thiophenoxide | 7.29    | 7.03     | 7.23       | –             |

## Binding distances of monodentate anchors

**Table S-III: Pairwise distances for anchors on (101)-S**

|               | aniline | pyridine | thiophenol | thiophenoxide |
|---------------|---------|----------|------------|---------------|
| aniline       | –       | 7.88     | 8.26       | 7.82          |
| pyridine      | 7.88    | –        | 6.77       | 6.85          |
| thiophenol    | 8.26    | 6.77     | –          | 7.06          |
| thiophenoxide | 7.82    | 6.85     | 7.06       | –             |

**Table S-IV: Pairwise distances for anchors on (101)-Cu**

|               | aniline | pyridine | thiophenol | thiophenoxide |
|---------------|---------|----------|------------|---------------|
| aniline       | –       | 5.23     | 4.90       | 4.67          |
| pyridine      | 5.23    | –        | 5.04       | 3.43          |
| thiophenol    | 4.90    | 5.04     | –          | 4.18          |
| thiophenoxide | 4.67    | 3.43     | 4.18       | –             |

**Table S-V: Pairwise distances for anchors on (100)**

|               | aniline | pyridine | thiophenol | thiophenoxide |
|---------------|---------|----------|------------|---------------|
| aniline       | –       | 5.75     | 6.68       | 7.46          |
| pyridine      | 5.75    | –        | 6.25       | 6.33          |
| thiophenol    | 6.68    | 6.25     | –          | 5.63          |
| thiophenoxide | 7.46    | 6.33     | 5.63       | –             |

**Table S-VI: Binding distances of monodentate anchor on thick slabs of CuSCN as measured between the anchor heteroatom and the nearest atom of the surface.**

| Cut      | Anchor        | Surface atom | Distance (Å) | Binding Energy |
|----------|---------------|--------------|--------------|----------------|
| (110)    | Thiophenoxide | Cu           | 2.21         | 0.17           |
| (110)    | Thiophenol    | Cu           | 2.48         | -0.21          |
| (110)    | Pyridine      | Cu           | 2.10         | -0.35          |
| (110)    | Aniline       | N            | 3.06         | -0.01          |
| (100)    | Thiophenoxide | Cu           | 2.19         | -0.13          |
| (100)    | Thiophenol    | Cu           | 2.31         | -0.44          |
| (100)    | Pyridine      | Cu           | 2.04         | -0.74          |
| (100)    | Aniline       | Cu           | 2.18         | -0.10          |
| (101)-S  | Thiophenoxide | S            | 2.99         | 1.00           |
| (101)-S  | Thiophenol    | S            | 3.25         | 0.10           |
| (101)-S  | Pyridine      | Cu           | 2.40         | 0.21           |
| (101)-S  | Aniline       | C            | 2.89         | 0.02           |
| (101)-Cu | Thiophenoxide | Cu           | 2.19         | -3.87          |
| (101)-Cu | Thiophenol    | Cu           | 2.25         | -0.92          |
| (101)-Cu | Pyridine      | Cu           | 1.98         | -1.55          |
| (101)-Cu | Aniline       | Cu           | 2.04         | -1.51          |
| (001)    | Thiophenoxide | Cu           | 2.26         | -4.53          |
| (001)    | Thiophenol    | Cu           | 2.30         | -0.43          |
| (001)    | Pyridine      | Cu           | 1.96         | -1.12          |
| (001)    | Aniline       | Cu           | 2.42         | -0.42          |
